# Supplementary material for: Weight control interventions improve therapeutic efficacy of dacarbazine in melanoma by reversing obesity-induced drug resistance
Source: PubMed Central journal article supplement (PMC5142287; doi:10.1186/s40170-016-0162-8), 2016-12-07
Supplement: 40170_2016_162_MOESM1_ESM.pdf [file 40170_2016_162_MOESM1_ESM.pdf]

**Additional File 1: Table S1.**

| <b>Ingredients</b> | <b>Normal diet (ND)</b> | <b>High fat diet (HFD)*</b> |
|--------------------|-------------------------|-----------------------------|
| Crude protein      | 19.26%                  | 22.55%                      |
| Crude fat          | 4.20%                   | 24.18%                      |
| Crude carbohydrate | 56.00%                  | 35.00%                      |
| Crude fiber        | 3.00%                   | 2.98%                       |
| Calcium            | 2.15%                   | 1.89%                       |
| Phosphorus         | 1.10%                   | 0.88%                       |
| Moisture           | 8.50%                   | 3.44%                       |
| Total ash          | 7.00%                   | 8.66%                       |

| <b>Diet</b>              | <b>ND</b>   | <b>HFD</b>  | <b>Groundnuts</b> | <b>Dry-coconuts</b> |
|--------------------------|-------------|-------------|-------------------|---------------------|
| <b>Energy<br/>Kcal/g</b> | 3.55 Kcal/g | 4.49 Kcal/g | 5.67 Kcal/g       | 1.87 Kcal/g         |

*Table S1 Malvi et al. 2016*

**Table S1.** Composition of diets used in the study. Normal diet (ND) was procured from Amrut Laboratory Animal Feed, Pune, India and high fat diet (HFD) was purchased from Provimi Animal Nutrition Pvt. Ltd., Bangalore, India. \*, HFD was also supplemented with 400 g groundnut and 200 g dried coconut per kg body weight of mice.
