# Supplementary material for: Weight control interventions improve therapeutic efficacy of dacarbazine in melanoma by reversing obesity-induced drug resistance
Source: PubMed Central journal article supplement (PMC5142287; doi:10.1186/s40170-016-0162-8), 2016-12-07
Supplement: 40170_2016_162_MOESM3_ESM.pdf [file 40170_2016_162_MOESM3_ESM.pdf]

**Additional File 3: Figure S1:**

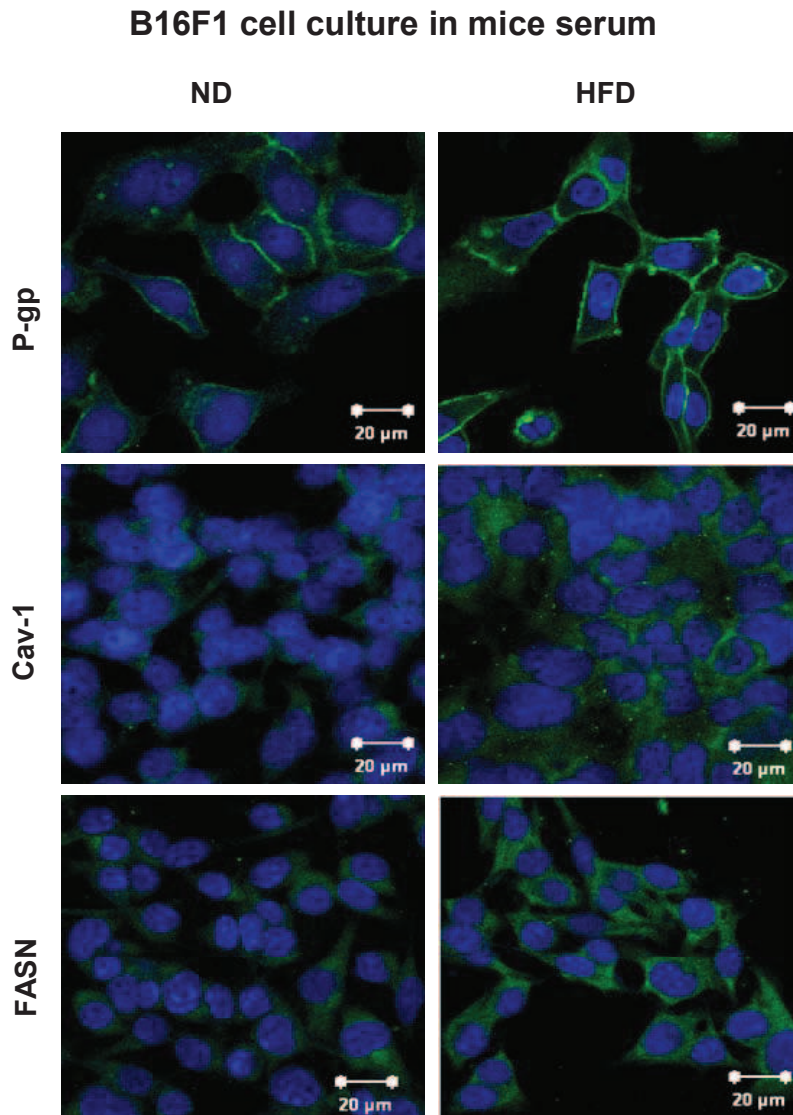

*Figure S1 Malvi et al. 2016*

**Figure S1.** Effect of obesity-associated serum factors on the protein level of P-gp, Cav-1 and FASN in B16F1 cells. B16F1 cells were chronically grown in medium containing 5% serum collected from ND or HFD C57BL/6J mice for 15 days. Thereafter, these cells were subjected to immunofluorescence confocal staining of the indicated molecules. The data were recorded using Zeiss LSM510 META Confocal Microscope. (Scale bar = 20  $\mu$ m).
